# Supplementary material for: Top research priorities for preterm birth: results of a prioritisation partnership between people affected by preterm birth and healthcare professionals
Source: PubMed Central journal article supplement (PMC6938013; doi:10.1186/s12884-019-2654-3), 2019-12-30
Supplement: 12884_2019_2654_MOESM6_ESM.pdf [file 12884_2019_2654_MOESM6_ESM.pdf]

# Reasons for excluding submissions

## Duplicates and excluded submissions based on discussion from Friday 8<sup>th</sup> March Steering Group meeting

Below is a list of excluded submissions based on discussion at the SG meeting.

(Red -> Reasons for exclusion)

### Exclusion Criteria

- Duplicate
- Non-Intervention
- Not uncertainties
- Pre-pregnancy
- Post-discharge from hospital or long-term health condition
- Staffing Issues?

### **Pre-pregnancy Education**

| ID number  | Original submissions                                                                                                                           | No. of submissions           | ID numbers |
|------------|------------------------------------------------------------------------------------------------------------------------------------------------|------------------------------|------------|
| 1860238343 | Are we getting any better at informing our young people about the causes of premature birth as a preventative measure.<br><b>PRE-PREGNANCY</b> | Health care professional (3) |            |

### **Treatment with Medications**

| ID number     | Original submissions                                                                                                                               | No. of submissions | ID numbers               |
|---------------|----------------------------------------------------------------------------------------------------------------------------------------------------|--------------------|--------------------------|
| 1849744543/1c | The effects of any illicit substance/ medication ie diazepam, on the foetus and length of withdrawal period thereafter<br><b>NOT UNCERTAINTIES</b> | HCP (1)            | <b>Not uncertainties</b> |
| 1837904252b   | psychiatric drug affect on in utero babies that are born premature.<br><b>NOT UNCERTAINTIES</b>                                                    | Service user (1)   | <b>Not uncertainties</b> |
| 1850073716/d  | how aspirin can work in pregnancy for those at risk etc<br><b>NOT UNCERTAINTIES</b>                                                                | Service user(1)    | <b>Not uncertainties</b> |

|               |                                                                                                                        |                             |                          |
|---------------|------------------------------------------------------------------------------------------------------------------------|-----------------------------|--------------------------|
| 1849744543/1b | The effects of 'excessive' maternal caffeine intake on the infant in utero/ in breast milk<br><b>NOT UNCERTAINTIES</b> | Health care professional(1) | <b>Not uncertainties</b> |
|---------------|------------------------------------------------------------------------------------------------------------------------|-----------------------------|--------------------------|

### Education during pregnancy

| ID number    | Original submissions                                                                                                                                   | No. of submissions |
|--------------|--------------------------------------------------------------------------------------------------------------------------------------------------------|--------------------|
| 1811391066/2 | I also feel woman need to be given more information about (if it is possible) how to help prevent premature labour/ birth.<br><br><b>PRE-PREGNANCY</b> | Service user (1)   |

### Other antenatal interventions

| ID number    | Original submissions                                                                                                                         | No. of submissions           |
|--------------|----------------------------------------------------------------------------------------------------------------------------------------------|------------------------------|
| 1828052501/d | Are there non-invasive ways that could replace current invasive testing for some conditions?<br><b>NOT DIRECTLY RELATED TO PRETERM BIRTH</b> | Health care professional (1) |
| 1845609676   | Platelets levels: safe level for physiotherapy interventions<br><b>INTERVENTION POST-DELIVERY</b>                                            | Health care professional (1) |
| 1829354898/a | Can preterm birth be delayed in any medical way?<br><b>TOO BROAD</b>                                                                         | Service user (1)             |

### Thermal care (keeping babies at the right temperature)

| ID number    | Original submissions                                                                                | No. of submissions | ID numbers                                   |
|--------------|-----------------------------------------------------------------------------------------------------|--------------------|----------------------------------------------|
| 1823560296/5 | Does it matter if babies are allowed to get cold at delivery?<br><b>Duplicate, already answered</b> | Both (1)           | <i>There is one other submission on this</i> |

### Effective Communication/Support to parents

| ID number    | Original submissions                                                           | No. of submissions | Additional ID numbers                                       |
|--------------|--------------------------------------------------------------------------------|--------------------|-------------------------------------------------------------|
| 1951091908/2 | How to consider the needs of all the family during preterm<br><b>DUPLICATE</b> | 1860226617/3       | <b>See original document, a lot of submissions for this</b> |
| 1813978902/2 | Couselling/Reassurance provided – feedback of this service<br><b>DUPLICATE</b> |                    |                                                             |
|              | Family support<br><b>DUPLICATE (in a number of sections)</b>                   |                    |                                                             |

### Other perinatal interventions

| ID number | Original submissions | No. of submissions |
|-----------|----------------------|--------------------|
|-----------|----------------------|--------------------|

|              |                                                                                                                                                                                             |                             |
|--------------|---------------------------------------------------------------------------------------------------------------------------------------------------------------------------------------------|-----------------------------|
| 1838009156/c | What makes a difference perinatally that will reduce the prevalence of subsequent disability or minimise the impact of potentially disabling conditions?<br><b>Too broad to be included</b> | Health care professional(1) |
|--------------|---------------------------------------------------------------------------------------------------------------------------------------------------------------------------------------------|-----------------------------|

### Other interventions after discharge

| ID number    | Original submissions                                                                                                                                                                              | No. of submissions           | Additional ID numbers |
|--------------|---------------------------------------------------------------------------------------------------------------------------------------------------------------------------------------------------|------------------------------|-----------------------|
| 1829443632   | Access to services in the community for preterm babies?<br><b>POST-DISCHARGE (combine the following three items to 'what is the best way to look after babies and families after discharge?')</b> | Both (1)                     |                       |
| 1813978902/2 | More home treatment to be available<br><b>POST-DISCHARGE</b>                                                                                                                                      | care at home (1)             |                       |
| 1811160846b  | Family support after discharge incl access to services in the community<br><b>POST-DISCHARGE</b>                                                                                                  | Service user (2), both (1)   |                       |
| P024         | What can mothers do for PTB as they are growing up to improve development?<br><b>POST-DISCHARGE (combine the following four items)</b>                                                            | Service User (1)             |                       |
| P003         | What about cognitive development therapy? Ways to support brain development eg music therapy<br><b>POST-DISCHARGE</b>                                                                             | Service User (1)             |                       |
| 1925109617   | Does responsive sensitive parenting result in improved long term developmental outcomes?<br><b>POST-DISCHARGE</b>                                                                                 | HCP (2)                      | 1895288557/1 (HCP)    |
| 1901490271b  | Comfort holding, does the person comforting make a big difference?<br><b>POST-DISCHARGE</b>                                                                                                       | No input (1)                 |                       |
| P010/2       | Pros & Cons of offering a pre-term birth clinic<br><b>POST-DISCHARGE (combine the following three items to 'best way to debrief after preterm birth and prepare for future pregnancies')</b>      | Health Care Professional (1) |                       |
| P035         | Thorough medical examinations after miscarriages to include causes<br><b>OUT OF SCOPE</b>                                                                                                         | Service User (1)             |                       |
| P008/2       | Appropriate feedback of possible causes of PTB<br><b>DUPLICATE</b>                                                                                                                                | Health Care Professional (1) |                       |
|              |                                                                                                                                                                                                   |                              |                       |
| P006/3       | Role of older siblings in caring for their pre-term sibling<br><br><b>POST-DISCHARGE</b>                                                                                                          | Health care professional (1) |                       |

### 1.8 Staff Issues

| ID number   | Original submissions                                                                                                         | No. of submissions | Additional ID numbers |
|-------------|------------------------------------------------------------------------------------------------------------------------------|--------------------|-----------------------|
| 1949597774b | Staff in antenatal/labour wards capable of detecting labour starting and being able to take steps to stop labour progressing | Service User (1)   |                       |

|            |                                                                                                                                                                                                                                                                                                                                                                                                                                                                                                                                                                                                                                                                                                                                                                                                                            |                  |  |
|------------|----------------------------------------------------------------------------------------------------------------------------------------------------------------------------------------------------------------------------------------------------------------------------------------------------------------------------------------------------------------------------------------------------------------------------------------------------------------------------------------------------------------------------------------------------------------------------------------------------------------------------------------------------------------------------------------------------------------------------------------------------------------------------------------------------------------------------|------------------|--|
|            | <p><b>STAFF ISSUES</b></p> <p>This is a staff education issue (a) what should staff know (b) how should staff be talking</p>                                                                                                                                                                                                                                                                                                                                                                                                                                                                                                                                                                                                                                                                                               |                  |  |
| 1949452693 | <p>The effects on medical staff and parents of parental presence at rounds and ways to develop policies so both groups maximise the benefits. Identifying weak points in the care cycle... do weekends and overnights affect levels of care especially in terms of continuity? Handovers: identify best practice to ensure SHOs and registrars ensure continuity of care. What support from the consultancy team works best? Communication with parents: do parents who receive regular communications (both written and verbal) feel better prepared and supported during the hospital stay? What information is most important?</p> <p><b>STAFF ISSUES</b></p> <p>Two themes (a) How should staff communicate about preterm babies with each other and with staff (b) what is the best pattern of care for preterms?</p> | Service User (1) |  |
